# Supplementary material
Source: PubMed Central journal article supplement (PMC3911313)
Supplement: JCM.01639-13_zjm999093158so6.pdf [file JCM.01639-13_zjm999093158so6.pdf]

1 Pathogenicity and phenotypic characterization of enterotoxigenic *Escherichia coli* isolated from a birth cohort of  
 2 rural Egyptian children  
 3

Table S1: Numbers and percentages of ETEC isolates that are associated with diarrhea (S) or not associated with diarrhea (AS) by toxin phenotype and child age and ETEC associated diarrhea incidence rate by child age in Abu Homos, Egypt from 2004 to 2007.

| Characteristics | LT, n(%)  |          | ST, n(%)  |           | LTST, n(%) |          | Total ETEC, n(%) |           |                  | ETEC incidence rate<br>episode/<br>child-year |
|-----------------|-----------|----------|-----------|-----------|------------|----------|------------------|-----------|------------------|-----------------------------------------------|
|                 | AS*       | S**      | AS        | S         | AS         | S        | AS               | S         | all <sup>§</sup> |                                               |
| 0-5             | 77(10.7)  | 58(17.4) | 76(16.9)  | 65(22.3)  | 17(13.2)   | 25(19)   | 170(13.1)        | 148(19.6) | 318(15.5)        | 1.2                                           |
| 6-11            | 168(23.3) | 93(27.8) | 138(30.8) | 109(37.5) | 35(27.1)   | 42(32)   | 341(26.3)        | 238(31.5) | 579(28.2)        | 1.8                                           |
| 12-17           | 215(29.8) | 99(29.6) | 120(26.7) | 64(22)    | 31(24)     | 40(30.5) | 366(28.2)        | 203(26.9) | 569(27.7)        | 1.6                                           |
| 18-23           | 261(36.2) | 84(25.1) | 115(25.6) | 53(18.2)  | 46(35.7)   | 30(22.9) | 422(32.4)        | 167(22.1) | 589(28.7)        | 1.3                                           |
| Total           | 721(100)  | 334(100) | 449(100)  | 291(100)  | 129(100)   | 131(100) | 1299(100)        | 756(100)  | 2055(100)        | 1.5                                           |

\* AS= ETEC infection that is not associated with diarrhea

\*\* S = ETEC infection that is associated with diarrhea

§ All ETEC isolates associated with symptomatic or asymptomatic ETEC infection.

4 Figure S1: Age stratified ETEC positivity ratios between asymptomatic and  
5 symptomatic children, **Abu Homos, Egypt 2004-2007**

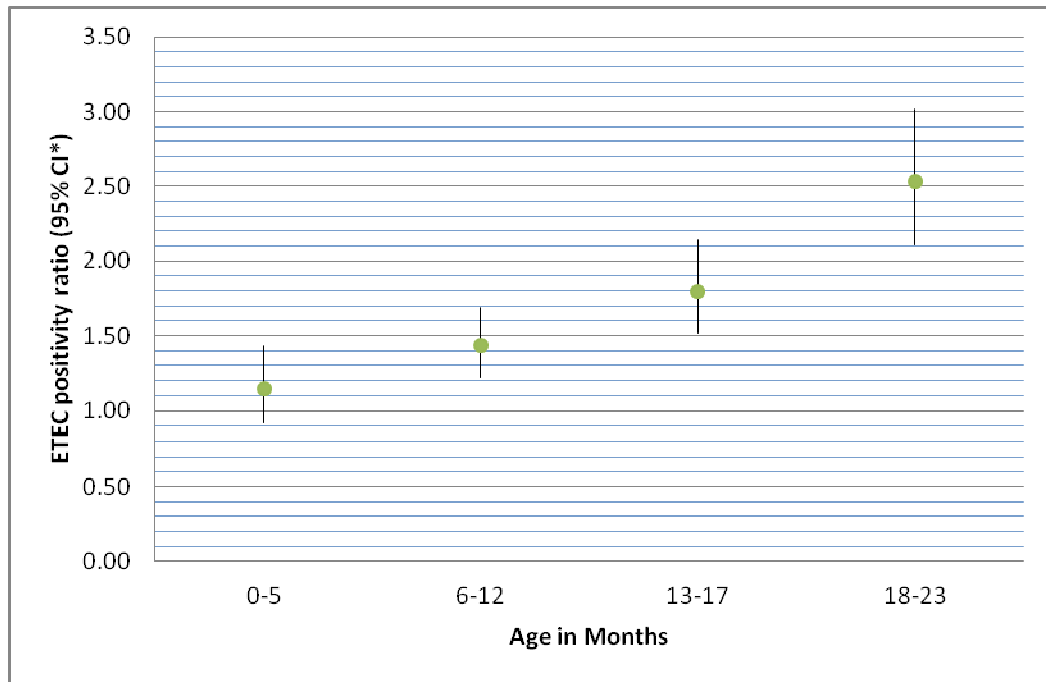

6  
7  
8  
9  
10  
11  
12  
13  
14  
15  
16  
17  
18  
19  
20

\* 95% CI= 95% confidence interval  
Dots represent the ratio of number of ETEC infection in children who have no diarrhea versus children who have diarrhea; and the bars represent the 95% confidence interval of those ratios.

21 **Table S2: Identification of CFAs expressing ETEC isolates in symptomatic**  
 22 **and asymptomatic children, classified by toxin types**

| Colonization factors | Symptomatic |             |               | Asymptomatic           |                        |                       |
|----------------------|-------------|-------------|---------------|------------------------|------------------------|-----------------------|
|                      | LT<br>N=334 | ST<br>N=291 | LTST<br>N=131 | LT<br>N=721            | ST<br>N=449            | LTST<br>N=129         |
| CFA/1                | 1(0.3)      | 48(16.5)    | 12(9.2)       | 1 (0.1)                | 39(8.7) <sup>¥</sup>   | 3(2.3) <sup>¶</sup>   |
| CFA/11               | 3(0.9)      | 16(5.5)     | 31(23.7)      | 5(0.7)                 | 14(3.1)                | 14(10.9) <sup>¥</sup> |
| - CS1                | 0(0.0)      | 10(3.4)     | 14(10.7)      | 3(0.4)                 | 7(1.6)                 | 5(3.9) <sup>¶</sup>   |
| - CS2                | 1(0.3)      | 4(1.4)      | 13(9.9)       | 0(0)                   | 4(0.9)                 | 5(3.9)                |
| - CS3                | 3(0.9)      | 16(5.5)     | 31(23.7)      | 2(0.3)                 | 14(3.1)                | 14(10.9) <sup>¥</sup> |
| CFA/111              | 2(0.6)      | 0(0.0)      | 0(0.0)        | 1 (0.1)                | 0(0.0)                 | 0(0.0)                |
| CFA/1V               | 2(0.6)      | 43(14.8)    | 21(16.0)      | 5(0.7)                 | 61(13.6)               | 11(8.5)               |
| - CS4                | 0(0)        | 2(0.7)      | 1(0.8)        | 0(0)                   | 2(0.5)                 | 1(0.8)                |
| - CS5                | 0(0)        | 3(1.0)      | 13(9.9)       | 1 (0.1)                | 1(0.2)                 | 3(2.3) <sup>¶</sup>   |
| - CS6                | 2(0.6)      | 38(13.1)    | 19(14.5)      | 4(0.6)                 | 58(12.9)               | 10(7.8)               |
| CS7                  | 18(5.4)     | 0(0.0)      | 7(5.3)        | 6(0.8) <sup>¥</sup>    | 1(0.2)                 | 1(0.8) <sup>¶</sup>   |
| CS17                 | 9(2.7)      | 0(0.0)      | 3(2.3)        | 11(1.5)                | 1(0.2)                 | 0(0.0)                |
| CS12                 | 3(0.9)      | 7(2.4)      | 3(2.3)        | 15(2.1)                | 18(4.1)                | 18(14.0) <sup>¥</sup> |
| CS14                 | 0(0)        | 21(7.2)     | 11(8.4)       | 0(0)                   | 16(3.6) <sup>¶</sup>   | 4(3.1)                |
| CFA Positive         | 38(11.4)    | 131(45.0)   | 83(63.4)      | 44(6.1) <sup>¥</sup>   | 146(32.5) <sup>¥</sup> | 50(38.8) <sup>¥</sup> |
| CFA Negative         | 296(88.6)   | 160(55.0)   | 48(36.6)      | 677(93.9) <sup>¥</sup> | 303(67.5) <sup>*</sup> | 79(61.7) <sup>¥</sup> |

23 <sup>¶</sup>: P <0.05    <sup>¥</sup>: P <0.001

24 **Table S3: ETEC-virulence characteristics associated with first documented**  
 25 **ETEC in symptomatic and asymptomatic children, Abu Homos, Egypt, 2004-**  
 26 **2007.**

| <b>ETEC phenotype</b> | <b>% (episodes)</b> | <b>% (controls)</b> | <b>Crude Odds ratio</b> | <b>Adjusted<sup>(a)</sup> Odds ratio</b> |
|-----------------------|---------------------|---------------------|-------------------------|------------------------------------------|
| <b>LT only</b>        | 10.9 (53)           | 8.2 (2)             | 1.37 (0.96, 1.96)       | 1.64 (1.09, 2.47) ¶                      |
| <b>CF +</b>           | 1.1 (17)            | 0.5 (18)            | 2.24 (1.15, 4.37) ¶     | 1.88 (0.97, 3.65)                        |
| <b>CF -</b>           | 8.9 (49)            | 7.5 (2)             | 1.21 (0.84, 1.74)       | 1.35 (0.81, 2.26)                        |
| <b>ST only</b>        | 12.3 (64)           | 7.0 (75)            | 1.86 (1.31, 2.64) ¥     | 1.81 (1.17, 2.80) ¶                      |
| <b>CF +</b>           | 3.1 (39)            | 1.5 (44)            | 2.07 (1.34, 3.21) ¥     | 1.88 (1.18, 2.98) ¶                      |
| <b>CF -</b>           | 7.2 (51)            | 4.9 (73)            | 1.49 (1.03, 2.16) ¶     | 1.43 (1.02, 2.01) ¶                      |
| <b>Any LT/ST</b>      | 11.8 (18)           | 5.0 (17)            | 2.55 (1.28, 5.10) ¶     | 2.45 (1.03, 5.82) ¶                      |
| <b>CF +</b>           | 3.7 (11)            | 2.3 (15)            | 1.66 (0.75, 3.65)       | 1.54 (0.65, 3.65)                        |
| <b>CF -</b>           | 3.9 (2)             | 1.7 (11)            | 2.35 (0.99, 5.61) ¶     | 1.92 (0.79, 4.64)                        |
| <b>All ETEC</b>       | 12.6 (135)          | 7.7 (181)           | 1.72 (1.36, 2.18) ¥     | 1.93 (1.46, 2.56) ¥                      |
| <b>CF +</b>           | 4.8 (113)           | 2.1 (116)           | 2.38 (1.83, 3.10) ¥     | 2.16 (1.62, 2.89) ¥                      |
| <b>CF -</b>           | 9.9 (123)           | 7.1 (189)           | 1.43 (1.13, 1.82) ¶     | 1.31 (0.96, 1.78)                        |

27 **(a):** Adjusted for age (in years), gender, season (warm/cool), mother's education  
 28 (some education/no education), and crowding (No. of persons per bed room),  
 29 using multivariate logistic regression model.

30 ¶: P <0.05

31

32

33

34 **Table S4: Frequency of ETEC isolation by toxin, colonization factor antigen**  
 35 **phenotype, and child's age groups in repeated diarrhea episodes in**  
 36 **symptomatic (S) as compared to asymptomatic (AS) children.**

| <i>ETEC phenotype</i> | <i>% (N)*</i>     | <i>% (N)**</i>    | <i>Crude</i>               | <i>Adjusted <sup>(a)</sup></i> |
|-----------------------|-------------------|-------------------|----------------------------|--------------------------------|
| <i>Age ( months)</i>  | <i>(S)</i>        | <i>(AS)</i>       | <i>Odds ratio</i>          | <i>Odds ratio</i>              |
| <b>Age (0-5)</b>      |                   |                   |                            |                                |
| <b>LT-CF+</b>         | 0.4 (2)           | 0.2 (2)           | 1.85 (0.54, 6.42)          | 1.68 (0.52, 5.40)              |
| <b>LT-CF-</b>         | 4.4 (53)          | 3.2 (72)          | 1.38 (0.96, 1.98)          | 1.29 (0.90, 1.86)              |
| <b>ST-CF+</b>         | 1.2 (14)          | 0.7 (15)          | 1.74 (0.84, 3.61)          | 1.56 (0.73, 3.23)              |
| <b>ST-CF-</b>         | 4.3 (51)          | 2.7 (61)          | 1.57 (1.08, 2.29) ¶        | 1.46 (0.99, 2.17)              |
| <b>LTST-CF+</b>       | 1.0 (2)           | 0.4 (2)           | 2.79 (1.14, 6.85) ¶        | 2.79 (1.20, 6.46) ¶            |
| <b>LTST-CF-</b>       | 1.1 (13)          | 0.4 (2)           | 2.69 (1.15, 6.31) ¶        | 2.41 (1.03, 5.66) ¶            |
| <b>All ETEC</b>       | <b>12.3 (148)</b> | <b>7.6 (170)</b>  | <b>1.70 (1.34, 2.14) ¥</b> | <b>1.58 (1.24, 2.01) ¥</b>     |
| <b>Age (6-11)</b>     |                   |                   |                            |                                |
| <b>LT-CF+</b>         | 1.0 (2)           | 0.7 (18)          | 1.41 (0.68, 2.95)          | 1.21 (0.55, 2.65)              |
| <b>LT-CF-</b>         | 6.7 (81)          | 5.9 (150)         | 1.15 (0.87, 1.52)          | 1.19 (0.90, 1.59)              |
| <b>ST-CF+</b>         | 4.2 (50)          | 1.8 (46)          | 2.36 (1.57, 3.54) ¥        | 2.11 (1.43, 3.09) ¥            |
| <b>ST-CF-</b>         | 4.9 (59)          | 3.6 (92)          | 1.38 (0.98, 1.92)          | 1.30 (0.95, 1.77)              |
| <b>LTST-CF+</b>       | 2.0 (24)          | 0.4 (11)          | 4.69 (2.29, 9.61) ¥        | 4.07 (2.16, 7.67) ¥            |
| <b>LTST-CF-</b>       | 1.0 (2)           | 0.9 (24)          | 1.06 (0.53, 2.12)          | 1.03 (0.54, 1.95)              |
| <b>All ETEC</b>       | <b>19.8 (238)</b> | <b>13.4 (341)</b> | <b>1.59 (1.33, 1.91) ¥</b> | <b>1.53 (1.26, 1.85) ¥</b>     |
| <b>Age (12-17)</b>    |                   |                   |                            |                                |

|                     |                   |                   |                            |                            |
|---------------------|-------------------|-------------------|----------------------------|----------------------------|
| <b>LT-CF+</b>       | 1.0 (2)           | 0.4 (2)           | 2.42 (0.98, 5.98)          | 1.97 (0.80, 4.83)          |
| <b>LT-CF-</b>       | 9.9 (90)          | 8.5 (205)         | 1.19 (0.92, 1.55)          | 1.09 (0.84, 1.42)          |
| <b>ST-CF+</b>       | 3.4 (31)          | 1.8 (43)          | 1.96 (1.23, 3.13) ¶        | 1.51 (0.93, 2.46)          |
| <b>ST-CF-</b>       | 3.7 (33)          | 3.2 (77)          | 1.15 (0.76, 1.75)          | 1.03 (0.70, 1.52)          |
| <b>LTST-CF+</b>     | 3.1 (2)           | 0.5 (13)          | 5.92 (3.05, 11.47) ¥       | 4.79 (2.57, 8.93) ¥        |
| <b>LTST-CF-</b>     | 1.3 (2)           | 0.7 (18)          | 1.79 (0.86, 3.74)          | 1.48 (0.74, 2.96)          |
| <b>All ETEC</b>     | <b>22.4 (203)</b> | <b>15.1 (366)</b> | <b>1.62 (1.34, 1.97) ¥</b> | <b>1.39 (1.13, 1.72) ¶</b> |
| <b>Age (18-23)</b>  |                   |                   |                            |                            |
| <b>LT-CF+</b>       | 1.7 (2)           | 0.5 (11)          | 3.76 (1.65, 8.55) ¥        | 3.27 (1.50, 7.13) ¶        |
| <b>LT-CF-</b>       | 10.4 (72)         | 10.7 (250)        | 0.98 (0.74, 1.29)          | 0.92 (0.69, 1.23)          |
| <b>ST-CF+</b>       | 5.2 (2)           | 1.8 (42)          | 3.02 (1.92, 4.75) ¥        | 2.85 (1.77, 4.57) ¥        |
| <b>ST-CF-</b>       | 2.5 (17)          | 3.1 (73)          | 0.79 (0.46, 1.34)          | 0.84 (0.53, 1.34)          |
| <b>LTST-CF+</b>     | 2.8 (19)          | 0.8 (18)          | 3.66 (1.91, 7.02) ¥        | 2.48 (1.36, 4.53) ¥        |
| <b>LTST-CF-</b>     | 1.6 (11)          | 1.2 (2)           | 1.37 (0.66, 2.71)          | 1.19 (0.61, 2.33)          |
| <b>All ETEC</b>     | <b>24.2 (167)</b> | <b>18.0 (422)</b> | <b>1.46 (1.19, 1.78) ¥</b> | <b>1.34 (1.10, 1.64) ¶</b> |
| <b>Overall ETEC</b> | <b>18.9 (756)</b> | <b>13.6(1299)</b> | <b>1.48 (1.34, 1.63) ¥</b> | <b>1.37 (1.24, 1.52) ¥</b> |

37 \* Number (percentage ) of ETEC isolates during the diarrhea episode

38 (symptomatic)

39 \*\* Number (percentage) of ETEC isolates from asymptomatic children (had  
40 no diarrhea).

41 (a): Adjusted for gender, season (warm/cold), breastfeeding (yes/no), and for the  
42 repeated measures of the same child, using multivariate logistic regression model.

43 ¶: P <0.05 ¥: P <0.001

44 **Table S5: Comparison of ETEC enterotoxins combined with CFAs between**  
 45 **symptomatic and asymptomatic controls.; Abu Homos, Egypt, 2004-2007\*.**

| <i>Toxin and CFA type(s)</i> | <i>Symptomatic</i> | <i>Asymptomatic</i> | <i>Adjusted OR (CI)</i> |
|------------------------------|--------------------|---------------------|-------------------------|
|                              | % (N) isolates     | %(N) isolates       |                         |
| <b>LT-CS7</b>                | 5.4 (18)           | 0.8 (6)             | 5.74 (2.19, 15.07)¥     |
| <b>ST-CFA/I</b>              | 16.5 (48)          | 8.7 (39)            | 2.48 (1.63, 3.77)¥      |
| <b>ST- CS14</b>              | 7.2 (21)           | 3.6 (16)            | 2.20 (1.22, 3.96)¥      |
| <b>LTST-CFA/I</b>            | 9.2 (12)           | 2.3 (3)             | 9.04 (2.63, 31.15)¥     |
| <b>LTST-CFA/II**</b>         | 23.7 (31)          | 10.9 (14)           | 4.61 (2.76, 7.69)¥      |
| <b>LTST-CS5</b>              | 9.9 (13)           | 2.3 (3)             | 4.73 (1.94, 11.50)¥     |
| <b>LTST-CS7</b>              | 5.3 (7)            | 0.8 (1)             | 9.57 (1.22, 75.19)¶     |
| <b>LTST- CS12</b>            | 2.3 (3)            | 14.0 (18)           | 0.33 (0.11, 0.92)¶      |

46 \* Adjusted for age (6 months intervals), season of diarrhea (warm/cold), child's  
 47 breastfeeding status (yes/no), and for the repeated measures of same child,  
 48 using multiple logistic regression model. Only variables demonstrated  
 49 significance between the two groups were mentioned in the table.

50 \*\*CFA/II = CS1 plus CS3; CS2 plus CS3 or CS3

51 ¶: P <0.05 ¥: P <0.001

52

53

54

55

56

57

58 **Table S6: Comparison of the detection of a CFA and associated relative**59 **risk (RR) of symptomatic (versus asymptomatic) ETEC infection**

| CFAs        | Symptomatic                   | Asymptomatic                   | Crude RR             | Adjusted RR (95% CI) |
|-------------|-------------------------------|--------------------------------|----------------------|----------------------|
|             | N (% isolate)<br>(Cases=4001) | N (% isolates)<br>(Cases=9539) | (95% CI)             | **                   |
| CFA/I Only  | 58(1.45)                      | 43 (0.5)                       | 3.22 (2.15, 4.80) ¥  | 2.82 (1.87, 4.27) ¥  |
| CFA/II Only | 48 (1.2)                      | 33 (0.4)                       | 3.27 (2.23, 4.79) ¥  | 3.14 (2.13, 4.63) ¥  |
| CS3 Only    | 8 (0.2)                       | 9 (0.09)                       | 2.10 (0.91, 4.84)    | 2.37 (1.01, 5.54) ¶  |
| CS1 + CS3   | 24 (0.6)                      | 12 (0.1)                       | 4.24 (2.48, 7.25) ¥  | 4.18 (2.38, 7.34) ¥  |
| CS2 + CS3   | 16 (0.4)                      | 9 (0.09)                       | 3.88 (1.80, 8.33) ¥  | 3.37 (1.58, 7.16) ¶  |
| CFA/IV Only | 62 (1.55)                     | 73 (0.77)                      | 1.83 (1.35, 2.48) ¥  | 1.83 (1.33, 2.50) ¥  |
| CS6 Only    | 45 (1.12)                     | 65 (0.69)                      | 1.58 (1.12, 2.25) ¶  | 1.62 (1.12, 2.33) ¶  |
| CS5 + CS6   | 11 (0.28)                     | 5 (0.05)                       | 3.34 (1.35, 8.26) ¶  | 3.21 (1.30, 7.91) ¶  |
| Other CFAs  | 76 (1.88)                     | 89 (0.93)                      | 1.99 (1.49, 2.67) ¥  | 1.79 (1.33, 2.40) ¥  |
| CS7         | 23 (0.57)                     | 7 (0.07)                       | 7.54 (3.21, 17.71) ¥ | 6.19 (2.58, 14.84) ¥ |
| CS14        | 31 (0.77)                     | 20 (0.21)                      | 3.35 (2.05, 5.49) ¥  | 2.59 (1.58, 4.24) ¥  |

60

61 95% CI= 95% Confidence Interval

62 ¶: P &lt;0.05 ¥: P &lt;0.001

63

64

65
